# Supplementary material for: Cost Function Analysis Applied to Different Kinetic Release Models of Arrabidaea chica Verlot Extract from Chitosan/Alginate Membranes
Source: MDPI journal article supplement (doi:10.3390/polym14061109), 2022-03-10
Supplement: s1 [file s1]

## Article

# Cost Function Analysis Applied to Different Kinetic Release Models of *Arrabidaea chica* Verlot Extract from Chitosan/Alginate Membranes

Luis Concha <sup>1</sup>, Ana Luiza Resende Pires <sup>2</sup>, Angela Maria Moraes <sup>2</sup>, Elizabeth Mas-Hernández <sup>3,4</sup> , Stefan Berres <sup>5,\*</sup> , and Jacobo Hernandez-Montelongo <sup>1,4,\*</sup> 

<sup>1</sup> Department of Physical and Mathematical Sciences, Catholic University of Temuco, 4813302 Temuco, Chile

<sup>2</sup> School of Chemical Engineering, University of Campinas, 13083-852 Campinas, Sao Paulo, Brazil

<sup>3</sup> Department of Mathematical Engineering, University of La Frontera, 4811230 Temuco, Chile

<sup>4</sup> Bioproducts and Advanced Materials Research Nucleus (BioMA), Catholic University of Temuco, 4813302 Temuco, Chile

<sup>5</sup> Department of Information System, University of Bio-Bio, 4051381 Concepcion, Chile

\* Correspondence: jacob.hernandez@uct.cl (J.H-M.), stefan.berres@gmail.com (S.B.)

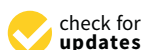

**Citation:** Concha, L.; Resende Pires, A.L.; Moraes, A.M.; Mas-Hernández, E.; Berres, S.; Hernandez-Montelongo, J. Cost Function Analysis Applied to Different Kinetic Release Models of *Arrabidaea chica* Verlot Extract from Chitosan/Alginate Membranes.

*Polymers* **2022**, *12*, 1109.

<https://doi.org/10.3390/polym14061109>

polym14061109

Academic Editors: Yadir Torres Hernández, Ana María Beltrán Custodio and Manuel Félix Ángel

Received: 8 December 2021

Accepted: 17 January 2022

Published: 10 March 2022

**Publisher's Note:** MDPI stays neutral with regard to jurisdictional claims in published maps and institutional affiliations.

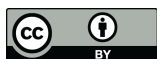

**Copyright:** © 2022 by the authors. Licensee MDPI, Basel, Switzerland. This article is an open access article distributed under the terms and conditions of the Creative Commons Attribution (CC BY) license (<https://creativecommons.org/licenses/by/4.0/>).

## 1. Supplementary Materials

The pseudo-code of the calculation of the cost function is described in Algorithm S1. The global computational variables  $\hat{\mathbf{t}}$ ,  $\hat{\mathbf{u}}$  contain the measurement data. The computational variable  $\mathbf{p}$  contains the model parameters.

### Algorithm S1 Cost function

```
function c = costfun(p)
global  $\hat{\mathbf{t}}$ ,  $\hat{\mathbf{u}}$ 
 $\mathbf{u} = \mathbf{uModel}(\hat{\mathbf{t}})$ ;
 $c = \sum_i (u_i - \hat{u}_i)^2$ 
```

The subroutine  $\mathbf{u} = \mathbf{uModel}(\hat{\mathbf{t}})$ , is evaluated for given times that agree with the measurement times, and is specified in Algorithm S2.

### Algorithm S2 Pseudo-code for the implementation of the model function

```
function  $\mathbf{u} = \mathbf{uModel}(\mathbf{t})$ 
global  $\mathbf{p}$ 
 $\mathbf{u} = p(1) * \mathbf{t} \wedge (p(2))$ 
```

The computational parameter  $\mathbf{t}$  might be a vector, such that the corresponding model values might be calculated simultaneously with results stored in  $\mathbf{u}$ . By convention, the MATLAB symbol  $\wedge$  denotes a component-wise operation of calculating an exponent. The model parameters  $\mathbf{p}$  are maintained as global variables. In this implementation example, the Korsmeyer-Peppas model is taken as reference model function.

In Algorithm S3 the residual is defined as a difference of the model and the data; its input variables are the same as for the cost function, namely the model parameters  $\mathbf{p}$  and the data. Reversely, the cost function can be calculated as the 2-norm of the residual.

### Algorithm S3 Residual function

```
function  $\mathbf{r} = \mathbf{residual}(\mathbf{p})$ 
global  $\hat{\mathbf{t}}$ ,  $\hat{\mathbf{u}}$ 
 $\mathbf{u} = \mathbf{uModel}(\hat{\mathbf{t}})$ ;
 $\mathbf{r} = \mathbf{u} - \hat{\mathbf{u}}$ 
```

In Algorithm S4 the steps of the overall procedure are indicated.

---

**Algorithm S4** Central routine that calls the optimization algorithms

---

- ✓ Clear registers, close the windows
  - ✓ Load the observation data
  - ✓ Choose initial optimization parameters
  - ✓ Run the optimization algorithm
  - ✓ Visualize the performance of the optimization algorithms
- 

For didactic reasons, we remind the method of Gauss-Newton, see Algorithm S5; this method is used for referential comparisons to other methods; more sophisticated methods starting with the Levenberg-Marquardt method can deal better with more ill-posed situations.

---

**Algorithm S5** Gauss-Newton method

---

```

p* ← Gauss-Newton(p0)
global XX FF
XX=[X];
FF=[norm(X)];
for i = 1; i ≤ 10 do
  F ← residual(X);
  J ← jacobian(X);
  DX = -J \ F;
  X=X+DX;
  FF=[FF norm(F)];
  XX=[XX X];
  if norm(F) < TOL then
    break
  end if
end for

```

---

Global optimization methods or machine learning algorithms might be alternatives to experiment with in order to generate more robust and diverse parameter fitting framework.
