# Supplementary figures and images for: Cost Function Analysis Applied to Different Kinetic Release Models of Arrabidaea chica Verlot Extract from Chitosan/Alginate Membranes
Source: MDPI journal article supplement (doi:10.3390/polym14061109), 2022-03-10

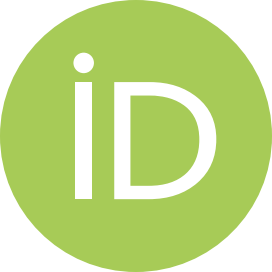

Supplement: s1 [file s1]

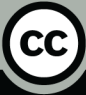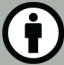

BY

Supplement: s1 [file s1]

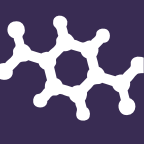

*polymers*

Supplement: s1 [file s1]
